# Supplementary material for: Social Responsibility Beyond the Corporate: Executive Mental Accounting Across Sectoral and Issue Domains
Source: Atypon-hosted journal article supplement (doi:10.1287/orsc.2021.1438), 2021-03-04
Supplement: orsc.2021.1438.sm1.pdf [file orsc.2021.1438.sm1.pdf]

## SUPPLEMENTARY FILE

### *Analytic strategy to operationalize similarity in social cause priorities (H2 & H3)*

While philanthropic and CSR causes reflect identical societal issues, the databases recording them—the FDO and KLD, respectively—report them in different ways. Therefore, we took several steps to operationalize similarity between philanthropic and CSR priorities. First, the FDO database uses the foundation’s tax files to consolidate allocation of grants into 25 philanthropic categories (FDO 2009; NCFP 2006), and does so for 75% of our sample’s total of 309 foundations. To measure philanthropic focus for the remaining foundations, we used the tax files to determine the dollar amounts granted by foundations to each of the 25 philanthropic categories (this information can span 100 pages in the tax file). These categories range from causes such as the rule of law to environmental and employment issues. We used the descriptions of the donations and recipients in the tax file to categorize each donation under one of the 25 philanthropic causes, sum the amounts granted for each cause, and then calculate the monetary weight of each cause in the foundation’s overall annual grantmaking. Descriptive characteristics of nonprofit foundations are presented in table A.

Next we created corresponding categories of causes for both domains. As we mentioned, the FDO uses a total of 25 dimensions of social causes. KLD uses six dimensions of social responsibility: Environment, Human Rights, Community, Diversity, Employee Relations, and Corporate Governance. The KLD dimension of Corporate Governance does not have an FDO equivalent, so we did not include it in the similarity measure. To create corresponding philanthropic and CSR domains, we mapped the 25 philanthropic social causes provided by FDO onto the KLD dimensions (table B). In the process, we merged the KLD dimensions of Employee and Diversity into one domain (i.e., Employee & Diversity), due to their similarity and the tendency of some FDO categories to fit both KLD dimensions. In post-hoc analyses reported below (tables C and D) we re-test H2 and H3 to see the effects of varying the matching of some FDO causes to KLD dimensions, since this procedure requires a degree of judgment and entails unavoidable imprecisions.

The final CSR strengths and foundation allocations measures we used to calculate the similarity dependent variables (which, as we mentioned, uses the Mahalanobis distance between the two) consist of two sets of four variables each, representing the four dimensions of social good: *Environmental*, *Human Rights*, *Community*, and *Employees & Diversity* (again corresponding closely to the recently popular “ESG”—environmental, social, and governance—dimensions but separating the social dimension into employment- and non-employment-based social impact). Tables E and F illustrate foundation grantmaking allocations across the four social dimensions (using unstandardized values for the top 20 independent foundations and the top 20 charities, as primary types of foundations) with the help of heat maps. Of course, we standardize these measures before operationalizing our final similarity dependent variable.

This supplementary file further contains the following illustrations and tables mentioned in the post-hoc analyses section of the manuscript: table G showing the matching between KLD and SASB sustainability indicators, table H showing the test of H1 using alternative statistical specifications, and tables I and J showing tests of H1 and H3 on each CSR dimension of *Environmental*, *Human Rights*, *Community*, and *Employees & Diversity*.

### ***Operationalization of materiality***

First, we coded the industry of each of our company based on SASB’s Sustainable Industry Classification System (SICS). Next, we identified which of the SASB issues are material for each industry (SICS) and followed Khan et al. (2016) to match each KLD topic with an SASB issue. This allowed us to finally code, for each company, the number of concerns and strengths that are likely to be material. As an additional precaution, note that our independent variable of KLD strengths is already standardized by industry, meaning that within the same materiality we look at variations in CSR, thus capturing both the materiality effect and the managerial discretion effect.

## ***Operationalization of CEO ideology***

To operationalize CEO ideology, we first calculated four ratio-based indicators: (1) *number of contributions* to Democratic party over total number of contributions to Democratic and Republican parties, (2) *amount of contributions* to Democratic party over total amount of contributions to Democratic and Republican parties, (3) *number of years* in which the CEO contributed to Democratic party over the total number of years in which the CEO contributed to Democratic and Republican parties, and (4) *number of distinct Democratic recipients* to whom the executive donated divided by the total number of distinct recipients of both parties. When computing these ratios, we followed prior research and accounted for zero contributions by adding 0.1 to the numerator and 0.2 to the denominator. Following Chin et al. (2013), we used the average of these ratios, which are indicative of the frequency, extent, persistence, and scope, respectively, of political contributions. As in previous studies, the index scores range from 0 to 1, with lower values indicating a strong conservative inclination and higher values indicating strong liberalism.

## ***Post-hoc Analyses and Robustness Checks***

We tested H1 using a population-averaged time series logit model with robust standard errors and a 1-year lag structure. Implementations using random effects, general estimation equations, and a 1-year autoregressive error structure closely replicated our main results. We tested H2 using mixed time series regressions on the entire universe of possible corporation-foundation dyads. Because this approach results in a large number of hypothetically possible but perhaps not relevant dyads, i.e., dyads for which the probability of receiving the ‘treatment’ of the CEO joining the board is effectively zero, we also estimated the average treatment effect of CEO choice of foundation, using the robust inverse-probability-weighted regression adjustment estimator (IPWRA) (Wooldridge 2007) with the controls in main analysis for the weighting equation. The main CEO effect was confirmed.

We further decomposed the independent variable used in H1 into its components *Environmental*, *Human Rights*, *Community*, and *Employees & Diversity* and replicated the main models separately for each dimension. The *p* values of the coefficients show that the overall effect is driven primarily by the *Environmental* and *Human Rights* dimensions. Regarding H3a, we similarly decomposed the dependent variable of similarity in future social cause priorities into its *Environmental*, *Human Rights*, *Community*, and *Employees & Diversity* components<sup>i</sup>. As for H1, our tests show that the main effect is driven by *Environmental* and *Human Rights* dimensions. Finally, we assessed the sensitivity of our findings to the coding of causes. For this, we varied the inclusion of foundation categories that might not map as accurately onto the KLD dimensions. For example, although spending on Education is a widespread CSR practice of many firms, Education cannot be mapped unambiguously to KLD and foundation categories and was hence excluded in the main analyses. In our post-hoc analyses, we instead included it under *Community*. Similarly, we included Health Organizations and Arts and Culture under *Community*, and we included Religion under *Human Rights*. Results were unaffected by these changes, suggesting that those categories are not central to the effects we found.

We control for many industry, firm, and individual-level alternative explanations in the main and separate analyses (see Table Q Supplemental file). However, the novelty of our study’s focus on executive cross-domain behavior prompted us to also run additional confirmatory tests. As we acknowledged, firms may engage in CSR for instrumental reasons (Flammer and Luo, 2017), not least if a dimension is especially salient for their business model. We control for CSR instrumentality with two covariates that mark the materiality of different social causes to the business, as assessed by SASB data at the industry level. Psychological research suggests that the instrumentality of benefits does not moderate the effect of moral actions on moral self-assessments. We interacted either materiality variable with CSR strength to validate this expectation. As expected, neither interaction term was statistically significant. In addition, one may wonder if an executive’s moral orientation moderates how sensitive s/he is to CSR engagement. To explore this possibility, we performed a post-hoc analysis where we interacted firm-level CSR strengths with CEO morality. As expected, CSR engagement is most predictive of a CEO joining a foundation board when the CEO uses more moral terms to discuss company business.

We also made the implicit argument that moral accounting processes are reliably stronger than experiential learning-based habituation, such that CEOs will join foundations with dissimilar (rather than similar) causes. Our controls for *CEO tenure* and for *CEO corporate/foundation overlap* account for experience with a particular set of social causes. Because the latter is a more direct measure of experiential learning in the context of foundation grant making, we performed a split sample analysis using the covariate's mean and median. In both cases, the effects we hypothesized in H2 (that of CEOs joining foundations pursuing a dissimilar cause than the corporation) are significant for the samples with the high experience condition, and not significant for the low experience samples. We obtain the same results when performing a split sample based on whether a firm has a corporate foundation or not.

We also examine the potential tradeoffs that an individual can make such as taking on a different cause in the same domain or taking the same or different cause in another domain. First, we repeat our main analyses for H2 (CEO choice predicting similarity or dissimilarity between firm and foundation) on a split sample where firms are included based on whether the overall CSR strengths of the firm are above or below the industry average. Results hold for the case of CSR strengths above industry, suggesting that firms generally doing well reach a point where doing more on the cause where they are particularly strong does not give them much more moral utility. These firms will focus on causes other than those they are stronger on, which is our main finding. Results are not significant for the case of CSR strengths below industry. Companies that are low overall do not compensate. Second, we interact our binary IV of CEO choice (H2) with a measure of CSR strengths variance that reflects whether the firm places uneven emphases across CSR causes. If firms pay attention to their overall CSR but also to the variance within, we should expect to see compensation for high variance, but not for low variance firms. We find that CEOs are more likely to join foundations pursuing dissimilar causes when there is high variation in CSR emphases such that one cause is distinctively higher in emphasis than the rest. For companies without high variance among causes, compensation does not occur because the benefits of any one of the causes is the same. Thus, the need to compensate on a cause depends on the diminishing returns from that cause. These results for both the split sample and variance interaction are consistent with the idea that firms will compensate when they are doing well overall, but the marginal unit of doing more on successful CSR domains gives less utility than joining a foundation that focuses on a different domain. However, when the firm is doing poorly overall, the firm would rather improve on the dimension that is worst in the portfolio.

Finally, regarding H1, one may wonder if CEOs only consider corporate CSR in their moral accounting in the form of visible outcome but not less observable effort. The KLD indicators used in the primary analyses do not fully distinguish between effort and outcome and blend efforts, such as instituting management systems or policies, with outcomes, such as the demographic diversity of the corporate leadership. Theoretically, the psychological literature on moral accounting suggests that effort in pursuing social causes and visible results equally affect an individual's sense of being morally good. Yet, we wanted to assess the validity of this premise in the context of more publicly visible executives. We checked the robustness of our analyses for H1 to using CSR indicators in the ASSET4 dataset, which clearly differentiates between input (i.e., effort) and output (i.e., outcome) but is less used in CSR research compared to KLD (Bouten et al. 2018): results hold. Because KLD provides us with standard categories that can be matched with foundation causes and because KLD indicators are widely used in prior CSR and thus offer comparability with other studies, we continued our analyses using KLD.

**SUPPLEMENTARY FILE TABLES**

Table A. Characteristics of nonprofit foundations (study panel)

| Characteristics               | Independent foundation | Public charity |
|-------------------------------|------------------------|----------------|
| Min of board size             | 0                      | 0              |
| Max of board size             | 55                     | 174            |
| Min of contribution diversity | 0                      | 0              |
| Max of contribution diversity | 2.64                   | 1.99           |
| Min of count causes           | 0                      | 0              |
| Max of count causes           | 26                     | 19             |

Table B. Matrix of FDO (philanthropic topics) and KLD (CSR topics) match

| KLD dimensions                     | Environmental                                       | Human Rights                                                          | Community                                                                                                                                                                           | Diversity & Employees | Other FDO dimensions                                                                                                                                                      |
|------------------------------------|-----------------------------------------------------|-----------------------------------------------------------------------|-------------------------------------------------------------------------------------------------------------------------------------------------------------------------------------|-----------------------|---------------------------------------------------------------------------------------------------------------------------------------------------------------------------|
| FDO<br>Philanthropic<br>dimensions | Animals/Wildlife<br>Environment<br>Agriculture/Food | Civil/Human Rights<br>International/Foreign Affairs<br>Public Affairs | Community Development<br>Crime/Law Enforcement<br>Youth Development<br>Human Services<br>Mental Health<br>Safety/Disasters<br>Health<br>Philanthropy/Voluntarism<br>Housing/Shelter | Employment            | Social Sciences<br>Recreation<br>Science<br>Religion*<br>Arts and Culture**<br>Medical Research<br>Other<br>Health Organizations**<br>Education**<br>Media/Communications |

1. Mapping developed by the first author, reproduced by the second author, and validated by several nonprofit practitioners.
2. "Other FDO dimensions" contains philanthropic social causes which could not be matched to KLD
3. When testing H2 and H3, we varied the inclusion of "Other FDO dimensions" under the KLD dimensions of Human Rights (denoted with "\*") and Community (denoted with "\*\*"). Results are essentially the same.

Table C. Tests of H2 by varying the inclusion of FDO social causes into KLD dimensions

|                                              | Model 1              | Model 2                      | Model 3                             | Model 4                        | Model 5                        |
|----------------------------------------------|----------------------|------------------------------|-------------------------------------|--------------------------------|--------------------------------|
|                                              | Paper                | Education under<br>Community | Arts and culture<br>under Community | Health org. under<br>Community | Religion under<br>Human rights |
| CEO choice (Corp. – Found. Link)             | -0.003*<br>(0.084)   | -0.003*<br>(0.081)           | -0.003**<br>(0.081)                 | -0.003*<br>(0.081)             | -0.003*<br>(0.085)             |
| Similarity in board size                     | -0.025***<br>(0.003) | -0.026***<br>(0.003)         | -0.026***<br>(0.003)                | -0.026***<br>(0.003)           | -0.024***<br>(0.003)           |
| Similarity in number of executives           | -0.007***<br>(0.002) | -0.006***<br>(0.002)         | -0.006***<br>(0.002)                | -0.006***<br>(0.002)           | -0.006***<br>(0.002)           |
| Similarity in size                           | 0.311***<br>(0.002)  | 0.334***<br>(0.002)          | 0.332***<br>(0.002)                 | 0.331***<br>(0.002)            | 0.342***<br>(0.002)            |
| Similarity in revenues                       | 0.257***<br>(0.002)  | 0.245***<br>(0.002)          | 0.252***<br>(0.002)                 | 0.253***<br>(0.002)            | 0.239***<br>(0.002)            |
| Geographic proximity                         | -0.035***<br>(0.000) | -0.033***<br>(0.000)         | -0.032***<br>(0.000)                | -0.033***<br>(0.000)           | -0.033***<br>(0.000)           |
| Corporate performance                        | 0.010***<br>(0.004)  | 0.010***<br>(0.004)          | 0.010***<br>(0.004)                 | 0.010***<br>(0.004)            | 0.011***<br>(0.004)            |
| Resource slack                               | -0.002***<br>(0.022) | -0.002**<br>(0.022)          | -0.002***<br>(0.021)                | -0.002**<br>(0.022)            | -0.001*<br>(0.022)             |
| Board community influential (prct)           | 0.011***<br>(0.007)  | 0.010***<br>(0.006)          | 0.010***<br>(0.006)                 | 0.010***<br>(0.006)            | 0.009***<br>(0.007)            |
| Positive media attention                     | -0.009***<br>(0.005) | -0.008***<br>(0.004)         | -0.009***<br>(0.004)                | -0.008***<br>(0.004)           | -0.009***<br>(0.005)           |
| Materiality of CSR concerns                  | -0.022***<br>(0.002) | -0.023***<br>(0.002)         | -0.022***<br>(0.002)                | -0.023***<br>(0.002)           | -0.024***<br>(0.002)           |
| Materiality of CSR strengths                 | -0.055***<br>(0.002) | -0.054***<br>(0.002)         | -0.054***<br>(0.002)                | -0.054***<br>(0.002)           | -0.057***<br>(0.002)           |
| CEO duality                                  | -0.026***<br>(0.005) | -0.026***<br>(0.005)         | -0.025***<br>(0.005)                | -0.026***<br>(0.005)           | -0.026***<br>(0.005)           |
| CEO tenure                                   | -0.009***<br>(0.000) | -0.010***<br>(0.000)         | -0.010***<br>(0.000)                | -0.010***<br>(0.000)           | -0.004***<br>(0.000)           |
| CEO ideology                                 | -0.011***<br>(0.009) | -0.011***<br>(0.009)         | -0.010***<br>(0.009)                | -0.011***<br>(0.009)           | -0.012***<br>(0.009)           |
| CEO corporate/foundation overlap             | -0.049***<br>(0.001) | -0.050***<br>(0.000)         | -0.050***<br>(0.000)                | -0.050***<br>(0.000)           | -0.050***<br>(0.001)           |
| Foundation grantmaking diversity             | -0.075***<br>(0.003) | -0.081***<br>(0.003)         | -0.078***<br>(0.003)                | -0.082***<br>(0.003)           | -0.080***<br>(0.003)           |
| Foundation relative size of board of trustee | -0.038***<br>(0.003) | -0.047***<br>(0.003)         | -0.045***<br>(0.003)                | -0.047***<br>(0.003)           | -0.045***<br>(0.003)           |
| Foundation type                              | 0.059***<br>(0.008)  | 0.056***<br>(0.008)          | 0.051***<br>(0.008)                 | 0.056***<br>(0.008)            | 0.056***<br>(0.008)            |
| Inverse-Mills ratio                          | -0.022***<br>(0.002) | -0.023***<br>(0.002)         | -0.022***<br>(0.002)                | -0.023***<br>(0.002)           | -0.023***<br>(0.002)           |
| Constant                                     | -0.337*<br>(0.133)   | -0.438***<br>(0.130)         | -0.435***<br>(0.128)                | -0.419**<br>(0.130)            | -0.513***<br>(0.134)           |
| Observations                                 | 954276               | 954276                       | 954276                              | 954276                         | 954276                         |
| Wald chi2                                    | 151582***            | 161354***                    | 163102***                           | 163795***                      | 161101***                      |
| R2(overall)                                  | 0.242                | 0.262                        | 0.260                               | 0.260                          | 0.262                          |
| Auto-corr Coef.                              | 0.155                | 0.144                        | 0.167                               | 0.144                          | 0.166                          |

Standardized beta coefficients. Standard errors in parentheses. Two-tailed tests. +  $p < 0.1$  \*  $p < 0.05$  \*\*  $p < 0.01$  \*\*\*  $p < 0.001$   $p$ -values are of limited value with a million dyadic observations, a complex data structure, and a combination of limited and continuous independent variables.

Table D. Tests of H3 by varying the inclusion of FDO social causes into KLD dimensions

|                                                | Model 1              | Model 2                   | Model 3                          | Model 4                     | Model 5                     |
|------------------------------------------------|----------------------|---------------------------|----------------------------------|-----------------------------|-----------------------------|
|                                                | Paper                | Education under Community | Arts and culture under Community | Health org. under Community | Religion under Human rights |
| Time since CEO joined                          | -0.061*<br>(0.027)   | -0.075**<br>(0.027)       | -0.075**<br>(0.027)              | -0.074**<br>(0.027)         | -0.074**<br>(0.028)         |
| Similarity in board size                       | 0.093+<br>(0.096)    | 0.097*<br>(0.095)         | 0.093+<br>(0.095)                | 0.097*<br>(0.095)           | 0.107*<br>(0.099)           |
| Similarity in number of executives             | -0.040<br>(0.077)    | -0.044<br>(0.077)         | -0.037<br>(0.077)                | -0.038<br>(0.078)           | -0.043<br>(0.081)           |
| Similarity in size                             | 0.144**<br>(0.077)   | 0.203***<br>(0.075)       | 0.199***<br>(0.075)              | 0.201***<br>(0.075)         | 0.220***<br>(0.080)         |
| Similarity in revenues                         | 0.105*<br>(0.108)    | 0.052<br>(0.106)          | 0.058<br>(0.106)                 | 0.053<br>(0.106)            | 0.047<br>(0.112)            |
| Geographic proximity                           | 0.047<br>(0.000)     | 0.010<br>(0.000)          | -0.004<br>(0.000)                | 0.009<br>(0.000)            | 0.005<br>(0.000)            |
| Corporate performance                          | 0.014<br>(0.088)     | 0.008<br>(0.088)          | 0.009<br>(0.087)                 | 0.008<br>(0.088)            | 0.010<br>(0.091)            |
| Resource slack                                 | -0.007<br>(3.458)    | -0.004<br>(3.444)         | -0.005<br>(3.413)                | -0.005<br>(3.449)           | -0.005<br>(3.545)           |
| Board community influential (prct)             | 0.017<br>(0.250)     | 0.006<br>(0.249)          | 0.004<br>(0.247)                 | 0.005<br>(0.249)            | 0.002<br>(0.259)            |
| Positive media attention                       | -0.023<br>(0.173)    | -0.005<br>(0.172)         | -0.005<br>(0.171)                | -0.005<br>(0.172)           | -0.005<br>(0.177)           |
| Materiality of CSR concerns                    | -0.049<br>(0.065)    | -0.054<br>(0.064)         | -0.056<br>(0.064)                | -0.052<br>(0.064)           | -0.051<br>(0.068)           |
| Materiality of CSR strengths                   | -0.102**<br>(0.044)  | -0.100**<br>(0.044)       | -0.095**<br>(0.044)              | -0.100**<br>(0.044)         | -0.106**<br>(0.046)         |
| CEO duality                                    | -0.069+<br>(0.185)   | -0.070+<br>(0.184)        | -0.069+<br>(0.184)               | -0.071+<br>(0.184)          | -0.071+<br>(0.193)          |
| CEO tenure                                     | 0.179***<br>(0.013)  | 0.181***<br>(0.013)       | 0.181***<br>(0.013)              | 0.181***<br>(0.013)         | 0.190***<br>(0.014)         |
| CEO ideology                                   | 0.034<br>(0.342)     | 0.044<br>(0.338)          | 0.047<br>(0.338)                 | 0.045<br>(0.338)            | 0.043<br>(0.357)            |
| CEO corporate/foundation overlap               | -0.065<br>(0.015)    | -0.067<br>(0.015)         | -0.069<br>(0.015)                | -0.067<br>(0.015)           | -0.068<br>(0.016)           |
| Foundation grantmaking diversity               | -0.015<br>(0.137)    | -0.018<br>(0.135)         | -0.008<br>(0.134)                | -0.018<br>(0.135)           | -0.023<br>(0.141)           |
| Foundation relative size of board of trustee   | 0.054<br>(0.093)     | 0.033<br>(0.092)          | 0.045<br>(0.092)                 | 0.036<br>(0.092)            | 0.044<br>(0.096)            |
| Foundation type                                | 0.139+<br>(0.274)    | 0.124+<br>(0.269)         | 0.121+<br>(0.269)                | 0.125+<br>(0.269)           | 0.128+<br>(0.285)           |
| Foundation contributions/Environment           | -0.058<br>(0.014)    | -0.057<br>(0.014)         | -0.068<br>(0.014)                | -0.057<br>(0.014)           | -0.052<br>(0.015)           |
| Foundation contributions/Human Rights          | -0.031<br>(0.014)    | -0.025<br>(0.014)         | -0.037<br>(0.014)                | -0.025<br>(0.014)           | -0.024<br>(0.014)           |
| Foundation contributions/Community             | -0.057<br>(0.012)    | -0.047<br>(0.012)         | -0.055<br>(0.012)                | -0.047<br>(0.012)           | -0.041<br>(0.012)           |
| Foundation contributions/Employees & Diversity | -0.221***<br>(0.018) | -0.205***<br>(0.017)      | -0.202***<br>(0.017)             | -0.207***<br>(0.018)        | -0.187***<br>(0.018)        |

|                     | Model 1           | Model 2                         | Model 3                                | Model 4                           | Model 5                        |
|---------------------|-------------------|---------------------------------|----------------------------------------|-----------------------------------|--------------------------------|
|                     | Paper             | Education<br>under<br>Community | Arts and culture<br>under<br>Community | Health org.<br>under<br>Community | Religion under<br>Human rights |
| Inverse-Mills ratio | -0.041<br>(0.087) | -0.034<br>(0.086)               | -0.030<br>(0.086)                      | -0.034<br>(0.086)                 | -0.029<br>(0.089)              |
| Constant            | 5.996<br>(20.542) | 3.588<br>(20.462)               | 4.088<br>(20.279)                      | 3.614<br>(20.490)                 | 4.593<br>(21.063)              |
| Observations        | 780               | 780                             | 780                                    | 780                               | 780                            |
| Wald chi2           | 132***            | 130***                          | 131***                                 | 130***                            | 127***                         |
| R2(overall)         | 0.280             | 0.267                           | 0.273                                  | 0.267                             | 0.252                          |
| Auto-corr Coef.     | 0.190             | 0.221                           | 0.232                                  | 0.220                             | 0.243                          |

Standardized beta coefficients. Standard errors in parentheses

Two-tailed tests. +  $p < 0.1$  \*  $p < 0.05$  \*\*  $p < 0.01$  \*\*\*  $p < 0.001$

Table E. Top 20 Independent foundations (by contributions made)

| Foundation Name                                   | Environmental | Governance | Community | Employees & Diversity | Other |
|---------------------------------------------------|---------------|------------|-----------|-----------------------|-------|
| Gates Foundation, Bill & Melinda                  | Light         | Dark       | Dark      | Light                 | Dark  |
| Packard Foundation, David and Lucile, The         | Dark          | Light      | Dark      | Light                 | Dark  |
| The John D. and Catherine T. MacArthur Foundation | Light         | Dark       | Dark      | Light                 | Dark  |
| Mellon Foundation, Andrew W., The                 | Light         | Light      | Light     | Light                 | Dark  |
| Starr Foundation, The                             | Light         | Dark       | Dark      | Light                 | Dark  |
| Casey Foundation, Annie E., The                   | Light         | Dark       | Dark      | Light                 | Dark  |
| Reynolds Foundation, Donald W.                    | Light         | Light      | Dark      | Light                 | Dark  |
| Sandler Family Supporting Foundation              | Light         | Dark       | Dark      | Light                 | Dark  |
| Duke Charitable Foundation, Doris                 | Dark          | Light      | Dark      | Light                 | Dark  |
| Houston Endowment Inc.                            | Light         | Light      | Dark      | Light                 | Dark  |
| Dell Foundation, Michael and Susan, The           | Light         | Light      | Dark      | Light                 | Dark  |
| Sloan Foundation, Alfred P.                       | Light         | Light      | Light     | Light                 | Dark  |
| Keck Foundation, W. M.                            | Light         | Light      | Dark      | Light                 | Dark  |
| Bradley Foundation, Inc., Lynde and Harry, The    | Light         | Dark       | Dark      | Light                 | Dark  |
| Weill Family Foundation, The                      | Light         | Light      | Light     | Light                 | Dark  |
| Welch Foundation, Robert A., The                  | Light         | Light      | Dark      | Light                 | Dark  |
| Skillman Foundation, The                          | Light         | Light      | Dark      | Light                 | Dark  |
| Dow Foundation, Herbert H. and Grace A., The      | Dark          | Light      | Dark      | Light                 | Dark  |
| Marriott Foundation, J. Willard and Alice S., The | Light         | Light      | Dark      | Light                 | Dark  |
| The Skoll Foundation                              | Dark          | Dark       | Dark      | Light                 | Dark  |

Notes: The darker the color of the cell, the more contributions are made for that social issue. *Other* contains mostly Education related grantmaking, which we included under *Community* in post-hoc analyses (with no changes in results).

Table F. Top 20 Public charities (by contributions made)

| Foundation Name                                     | Environmental | Governance | Community | Employees & Diversity | Other |
|-----------------------------------------------------|---------------|------------|-----------|-----------------------|-------|
| United States Fund for UNICEF                       |               |            | Dark      |                       |       |
| University of Wisconsin Foundation                  |               |            |           |                       | Dark  |
| Save The Children Federation, Inc.                  | Dark          | Dark       | Dark      |                       |       |
| University of Illinois Foundation                   |               |            |           |                       | Dark  |
| Juvenile Diabetes Research Foundation International |               |            |           |                       | Dark  |
| United Negro College Fund, Inc.                     |               |            |           |                       | Dark  |
| Robin Hood Foundation, The                          |               |            | Dark      |                       |       |
| Twin Cities United Way, Greater                     |               |            | Dark      |                       |       |
| McCormick Foundation, Robert R.                     |               |            | Dark      |                       |       |
| Boys & Girls Clubs of America                       |               |            | Dark      |                       |       |
| United Way of New York City                         |               |            | Dark      |                       |       |
| Georgia Tech Foundation, Inc.                       |               |            |           |                       | Dark  |
| Wisconsin Alumni Research Foundation                |               |            |           |                       | Dark  |
| New York-Presbyterian Fund, Inc.                    |               |            | Dark      |                       |       |
| University of Cincinnati Foundation                 |               |            |           |                       | Dark  |
| International Rescue Committee, Inc.                |               |            | Dark      |                       |       |
| Lucile Packard Foundation for Children's Health     |               | Dark       | Dark      |                       |       |
| National Merit Scholarship Corporation              |               |            |           |                       | Dark  |
| Iowa State University Foundation                    |               |            |           |                       | Dark  |
| ClimateWorks Foundations                            | Dark          |            | Dark      |                       |       |

Notes: The darker the color of the cell, the more contributions are made for that social issue. *Other* contains mostly Education related grantmaking, which we included under *Community* in post-hoc analyses (with no changes in results).

Table G. KLD – SASB Concerns Matching (adapted from Khan et al. 2016)

| KLD dimension         | KLD Variable | KLD Variable Description                            | SASB Issue                                           | SASB dimension              |
|-----------------------|--------------|-----------------------------------------------------|------------------------------------------------------|-----------------------------|
| Community             | COM_con_A    | Investment Controversies (1991 to 2009)             | Fair disclosure and labeling                         | Social Capital              |
|                       | COM_con_B    | Community Impact (from 1991)                        | Access and affordability                             | Social Capital              |
|                       | COM_con_D    | Tax Disputes (1991 to 2009)                         | Customer welfare                                     | Social Capital              |
| Diversity & Employees | DIV_con_A    | Workforce Diversity (from 1991)                     | Diversity and inclusion                              | Human Capital               |
|                       | DIV_con_B    | Non-Representation (from 1993 through 2011)         | Diversity and inclusion                              | Human Capital               |
|                       | DIV_con_C    | Board of Directors - Gender (from 1991)             | Diversity and inclusion                              | Human Capital               |
|                       | EMP_con_A    | Union Relations (from 1991)                         | Labor relations                                      | Human Capital               |
|                       | EMP_con_B    | Employee Health & Safety (from 1991)                | Employee health, safety and wellbeing                | Human Capital               |
|                       | EMP_con_C    | Workforce Reductions (1991 to 2009)                 | Recruitment, development and retention               | Human Capital               |
|                       | EMP_con_D    | Retirement Benefits Concern (1992 to 2009)          | Compensation and benefits                            | Human Capital               |
|                       | EMP_con_F    | Supply Chain (from 1998)                            | Supply chain management                              | Leadership & Governance     |
|                       | HUM_con_F    | Labor Rights Concern (1998 to 2009)                 | Fair labor practices                                 | Human Capital               |
|                       | ENV_con_A    | Hazardous Waste (1991 to 2009)                      | Waste and hazardous materials management             | Environment                 |
|                       | ENV_con_B    | Regulatory Compliance (from 1991)                   | GHG emissions                                        | Environment                 |
| Environmental         | ENV_con_C    | Ozone Depleting Chemicals (1991 to 2009)            | GHG emissions                                        | Environment                 |
|                       | ENV_con_D    | Toxic Spills & Releases (from 1991)                 | Air quality                                          | Environment                 |
|                       | ENV_con_E    | Agriculture Chemicals (1991 to 2009)                | Waste and hazardous materials management             | Environment                 |
|                       | ENV_con_F    | Climate Change (from 1999)                          | GHG emissions                                        | Environment                 |
|                       | ENV_con_G    | Impact of Products & Services (from 2010)           | Fuel management                                      | Environment                 |
|                       | ENV_con_H    | Biodiversity & Land Use (from 2010)                 | Biodiversity impacts                                 | Environment                 |
|                       | ENV_con_I    | Operational Waste (from 2010)                       | Environmental, social impacts on assets & operations | Business Model & Innovation |
|                       | NUC_con_A    | Involvement (1991 to 2002)                          | Waste and hazardous materials management             | Environment                 |
|                       | NUC_con_C    | Design (1991 to 2002)                               | Energy management                                    | Environment                 |
|                       | NUC_con_D    | Fuel Cycle/Key Parts (1991 to 2002)                 | Fuel management                                      | Environment                 |
| Human Rights          | HUM_con_A    | South Africa (1991 to 1994)                         | Regulatory capture and political influence           | Leadership & Governance     |
|                       | HUM_con_B    | Northern Ireland (1991 to 1994)                     | Regulatory capture and political influence           | Leadership & Governance     |
|                       | HUM_con_C    | Support for Controversial Regimes (from 1994)       | Business ethics and transparency of payments         | Leadership & Governance     |
|                       | HUM_con_D    | Mexico (1994 to 2001)                               | Regulatory capture and political influence           | Leadership & Governance     |
|                       | HUM_con_G    | Indigenous Peoples Relations Concern (2000 to 2009) | Materials sourcing                                   | Leadership & Governance     |
|                       | HUM_con_H    | Operations in Sudan (from 2010 to 2011)             | Regulatory capture and political influence           | Leadership & Governance     |
|                       | CGOV_con_I   | Political Accountability Concern (2005 to 2007)     | Regulatory capture and political influence           | Leadership & Governance     |

Table H. KLD – SASB Strengths Matching (adapted from Khan et al. 2016)

| KLD dimension | KLD Variable          | KLD Variable Description                          | SASB Issue                                           | SASB dimension                |
|---------------|-----------------------|---------------------------------------------------|------------------------------------------------------|-------------------------------|
| Community     | COM_str_A             | Charitable Giving (from 1991 through 2011)        | Human rights and community relations                 | Social Capital                |
|               | COM_str_B             | Innovative Giving (from 1991)                     | Environmental, social impacts on assets & operations | Business Model and Innovation |
|               | COM_str_C             | Support for Housing (1991 to 2009)                | Access and affordability                             | Social Capital                |
|               | COM_str_D             | Support for Education (1994 to 2009)              | Human rights and community relations                 | Social Capital                |
|               | COM_str_F             | Non-US Charitable Giving (1994 to 2009)           | Regulatory capture and political influence           | Leadership and Governance     |
|               | COM_str_G             | Volunteer Programs (2005 to 2009)                 | Human rights and community relations                 | Social Capital                |
|               | COM_str_H             | Community Engagement (from 2010)                  | Human rights and community relations                 | Social Capital                |
|               | Diversity & Employees | DIV_str_A                                         | CEO (1991 to 2009)                                   | Compensation and benefits     |
| DIV_str_B     |                       | Promotion (from 1991 through 2011)                | Recruitment, development and retention               | Human Capital                 |
| DIV_str_C     |                       | Board of Directors - Gender(from 1991)            | Diversity and inclusion                              | Human Capital                 |
| DIV_str_D     |                       | Work-Life Benefits (from 1991 through 2011)       | Employee health, safety and wellbeing                | Human Capital                 |
| DIV_str_E     |                       | Women and Minority Contracting (from 1991)        | Diversity and inclusion                              | Human Capital                 |
| DIV_str_F     |                       | Employment of the Disabled (1991 to 2009)         | Diversity and inclusion                              | Human Capital                 |
| DIV_str_G     |                       | Gay and Lesbian Policies (from 1995 through 2011) | Diversity and inclusion                              | Human Capital                 |
| DIV_str_H     |                       | Employment of Underrepresented Groups (from 2010) | Diversity and inclusion                              | Human Capital                 |
| EMP_str_A     |                       | Union Relations (from 1991)                       | Labor relations                                      | Human Capital                 |
| EMP_str_B     |                       | No-Layoff Policy (1991 to 1993)                   | Recruitment, development and retention               | Human Capital                 |
| EMP_str_C     |                       | Cash Profit Sharing (from 1991)                   | Compensation and benefits                            | Human Capital                 |
| EMP_str_D     |                       | Employee Involvement (from 1991)                  | Fair labor practices                                 | Human Capital                 |
| EMP_str_F     |                       | Retirement Benefits Strength (1991 to 2009)       | Compensation and benefits                            | Human Capital                 |
| EMP_str_G     |                       | Employee Health and Safety (from 2003)            | Employee health, safety and wellbeing                | Human Capital                 |
| EMP_str_H     |                       | Supply Chain Labor Standards (from 2002)          | Fair labor practices                                 | Human Capital                 |
| Environmental |                       | ENV_str_A                                         | Environmental Opportunities (from 1991)              | Biodiversity impacts          |
|               | ENV_str_B             | Waste Management (from 1991)                      | Waste and hazardous materials management             | Environment                   |
|               | ENV_str_C             | Packaging Materials & Waste (from 1991)           | Waste and hazardous materials management             | Environment                   |
|               | ENV_str_D             | Climate Change (from 1991)                        | GHG emissions                                        | Environment                   |
|               | ENV_str_F             | Property, Plant, Equipment (1991 to 1995)         | Waste and hazardous materials management             | Environment                   |
|               | ENV_str_G             | Environmental Management Systems (from 2006)      | Waste and hazardous materials management             | Environment                   |
|               | Human Rights          | HUM_str_A                                         | Positive Record in S. Africa (1994 to 1995)          | Fair labor practices          |
| HUM_str_D     |                       | Indigenous Peoples Relations Strength (from 2000) | Fair labor practices                                 | Human Capital                 |
| HUM_str_G     |                       | Labor Rights Strength (2002 to 2009)              | Labor relations                                      | Human Capital                 |

Table I. Tests of H1 using alternative specifications

|                                        | Model1               | Model 2            | Model 3              | Model 4            | Model 5            | Model 6              |
|----------------------------------------|----------------------|--------------------|----------------------|--------------------|--------------------|----------------------|
|                                        | Paper (xtlogit pa)   | xtlogit re         | xtprobit pa          | xtprobit re        | xtregar            | xtgee                |
| CSR strengths                          | -2.698**<br>(0.040)  | -2.702*<br>(0.052) | -1.163**<br>(0.016)  | -1.168*<br>(0.022) | -0.050*<br>(0.001) | -0.050***<br>(0.001) |
| Materiality of CSR concerns            | 1.887**<br>(0.082)   | 1.879**<br>(0.084) | 0.828**<br>(0.037)   | 0.826**<br>(0.038) | 0.054**<br>(0.002) | 0.054*<br>(0.003)    |
| Materiality of CSR strengths           | 0.726<br>(0.092)     | 0.726<br>(0.093)   | 0.320<br>(0.041)     | 0.323<br>(0.042)   | 0.021<br>(0.003)   | 0.020<br>(0.003)     |
| Corporate size                         | 1.000<br>(0.125)     | 0.944<br>(0.108)   | 0.533<br>(0.053)     | 0.505<br>(0.045)   | 0.025<br>(0.002)   | 0.022<br>(0.003)     |
| Corporate performance                  | 1.790***<br>(0.483)  | 1.822*<br>(0.648)  | 0.817**<br>(0.239)   | 0.829*<br>(0.317)  | 0.032+<br>(0.016)  | 0.035**<br>(0.012)   |
| Resource slack                         | 0.276*<br>(0.193)    | 0.274<br>(1.936)   | 0.120*<br>(0.069)    | 0.119<br>(0.790)   | 0.005<br>(0.023)   | 0.005**<br>(0.002)   |
| Innovation differentiation             | 1.406***<br>(0.760)  | 1.424*<br>(1.235)  | 0.610**<br>(0.373)   | 0.618+<br>(0.597)  | 0.032+<br>(0.035)  | 0.033*<br>(0.027)    |
| Marketing differentiation              | 0.482<br>(4.325)     | 0.478<br>(4.394)   | 0.201<br>(1.863)     | 0.202<br>(1.904)   | 0.010<br>(0.106)   | 0.010<br>(0.106)     |
| Corporate foundation age               | 1.733*<br>(0.007)    | 1.743*<br>(0.007)  | 0.724+<br>(0.003)    | 0.727+<br>(0.003)  | 0.039+<br>(0.000)  | 0.041+<br>(0.000)    |
| Board independence                     | 0.381<br>(1.162)     | 0.412<br>(1.358)   | 0.192<br>(0.483)     | 0.206<br>(0.578)   | 0.006<br>(0.027)   | 0.006<br>(0.020)     |
| Board community influential (prct)     | 0.369<br>(0.502)     | 0.342<br>(0.489)   | 0.133<br>(0.212)     | 0.122<br>(0.204)   | 0.007<br>(0.010)   | 0.007<br>(0.010)     |
| Board with foundation positions (prct) | 1.772+<br>(0.896)    | 1.818*<br>(0.796)  | 0.712+<br>(0.389)    | 0.733*<br>(0.338)  | 0.039*<br>(0.019)  | 0.039+<br>(0.021)    |
| Positive media attention               | -1.449*<br>(0.416)   | -1.432*<br>(0.407) | -0.650*<br>(0.182)   | -0.642*<br>(0.177) | -0.033+<br>(0.010) | -0.034+<br>(0.011)   |
| Shareholder resolutions                | -1.964<br>(0.096)    | -1.943+<br>(0.080) | -0.901+<br>(0.038)   | -0.894+<br>(0.033) | -0.038+<br>(0.001) | -0.038+<br>(0.001)   |
| Analyst rating                         | 1.522+<br>(0.207)    | 1.529<br>(0.230)   | 0.624+<br>(0.088)    | 0.625<br>(0.095)   | 0.026<br>(0.004)   | 0.026*<br>(0.003)    |
| CEO duality                            | 1.468<br>(0.306)     | 1.445<br>(0.291)   | 0.596<br>(0.123)     | 0.587<br>(0.120)   | 0.029<br>(0.006)   | 0.028+<br>(0.005)    |
| CEO tenure                             | -0.519<br>(0.023)    | -0.483<br>(0.021)  | -0.197<br>(0.010)    | -0.184<br>(0.009)  | -0.008<br>(0.001)  | -0.009<br>(0.001)    |
| CEO attentional heterogeneity          | 0.437<br>(1.569)     | 0.440<br>(1.989)   | 0.141<br>(0.738)     | 0.142<br>(0.948)   | 0.014<br>(0.054)   | 0.015<br>(0.056)     |
| CEO previous trustee position          | 0.365<br>(0.265)     | 0.553<br>(0.245)   | 0.167<br>(0.114)     | 0.251<br>(0.105)   | 0.006<br>(0.006)   | 0.016<br>(0.006)     |
| CEO morality                           | -1.461+<br>(0.557)   | -1.501<br>(0.634)  | -0.617+<br>(0.239)   | -0.632<br>(0.267)  | -0.028<br>(0.012)  | -0.028*<br>(0.009)   |
| CEO ideology                           | 0.433<br>(0.489)     | 0.441<br>(0.473)   | 0.162<br>(0.207)     | 0.166<br>(0.199)   | 0.009<br>(0.010)   | 0.009<br>(0.010)     |
| CEO corporate/foundation overlap       | -0.612<br>(0.032)    | -0.627<br>(0.032)  | -0.265<br>(0.013)    | -0.274<br>(0.014)  | -0.016<br>(0.001)  | -0.017<br>(0.001)    |
| CEO donations                          | 1.796*<br>(0.047)    | 1.759*<br>(0.047)  | 0.759*<br>(0.020)    | 0.747*<br>(0.020)  | 0.040*<br>(0.001)  | 0.038*<br>(0.001)    |
| CEO foundation count                   | -1.227<br>(0.165)    | -1.223<br>(0.150)  | -0.470<br>(0.069)    | -0.468<br>(0.062)  | -0.026<br>(0.003)  | -0.025<br>(0.003)    |
| Constant                               | -9.087***<br>(2.022) | -9.084<br>(11.615) | -4.352***<br>(0.806) | -4.350<br>(4.740)  | -0.075<br>(0.142)  | -0.073*<br>(0.036)   |

|              | Model1             | Model 2             | Model 3     | Model 4            | Model 5 | Model 6 |
|--------------|--------------------|---------------------|-------------|--------------------|---------|---------|
|              | Paper (xtlogit pa) | xtlogit re          | xtprobit pa | xtprobit re        | xtregar | xtgee   |
| Insig2u      |                    | -10.811<br>(40.738) |             | -7.474<br>(15.105) |         |         |
| Observations | 3576               | 3576                | 3576        | 3576               | 3576    | 3576    |
| Wald chi2    | 69***              | 51***               | 69***       | 48***              | 49***   | 50***   |

Notes: All except Constant are standardized beta coefficients. Robust standard errors in parentheses, except RE models  
Two-tailed tests. + p < 0.1 \* p < 0.05 \*\* p < 0.01 \*\*\* p < 0.001  
All controls are lagged.

Table J. Test of H1 on each CSR dimension

|                                        | Model1              | Model2               | Model3             | Model4                |
|----------------------------------------|---------------------|----------------------|--------------------|-----------------------|
|                                        | Environmental       | Governance           | Community          | Employees & Diversity |
| CSR strengths                          | -3.380**<br>(0.183) | -2.027***<br>(0.462) | -0.653<br>(0.258)  | -0.588<br>(0.129)     |
| Materiality of CSR concerns            | 2.077***<br>(0.081) | 1.910**<br>(0.083)   | 1.819**<br>(0.082) | 1.893**<br>(0.082)    |
| Materiality of CSR strengths           | 0.522<br>(0.089)    | 0.488<br>(0.086)     | 0.660<br>(0.115)   | 0.436<br>(0.087)      |
| Corporate size                         | 0.522<br>(0.120)    | 0.372<br>(0.126)     | 0.488<br>(0.124)   | 0.454<br>(0.124)      |
| Corporate performance                  | 1.658**<br>(0.495)  | 1.648**<br>(0.505)   | 1.643**<br>(0.492) | 1.715**<br>(0.492)    |
| Resource slack                         | 0.235+<br>(0.192)   | 0.312*<br>(0.208)    | 0.303*<br>(0.207)  | 0.279+<br>(0.204)     |
| Innovation differentiation             | 1.223**<br>(0.816)  | 1.076*<br>(0.917)    | 1.132*<br>(0.892)  | 1.201*<br>(0.902)     |
| Marketing differentiation              | 0.298<br>(4.403)    | 0.146<br>(4.687)     | 0.162<br>(4.644)   | 0.149<br>(4.681)      |
| Corporate foundation age               | 1.684+<br>(0.007)   | 1.483+<br>(0.007)    | 1.505+<br>(0.007)  | 1.482+<br>(0.007)     |
| Board independence                     | 0.216<br>(1.269)    | 0.205<br>(1.264)     | 0.183<br>(1.269)   | 0.198<br>(1.260)      |
| Board community influential (prct)     | 0.206<br>(0.508)    | 0.414<br>(0.524)     | 0.415<br>(0.521)   | 0.426<br>(0.519)      |
| Board with foundation positions (prct) | 1.758+<br>(0.895)   | 1.639+<br>(0.911)    | 1.652+<br>(0.933)  | 1.603+<br>(0.906)     |
| Positive media attention               | -1.392+<br>(0.425)  | -1.515*<br>(0.426)   | -1.529*<br>(0.424) | -1.504*<br>(0.423)    |
| Shareholder resolutions                | -2.001<br>(0.096)   | -2.442+<br>(0.099)   | -2.468+<br>(0.102) | -2.485+<br>(0.101)    |
| Analyst rating                         | 1.504+<br>(0.216)   | 1.413+<br>(0.210)    | 1.428+<br>(0.212)  | 1.448+<br>(0.212)     |
| CEO duality                            | 1.474<br>(0.308)    | 1.267<br>(0.309)     | 1.347<br>(0.306)   | 1.342<br>(0.306)      |
| CEO tenure                             | -0.419<br>(0.023)   | -0.444<br>(0.023)    | -0.502<br>(0.024)  | -0.465<br>(0.024)     |
| CEO attentional heterogeneity          | 0.461<br>(1.546)    | 0.541<br>(1.483)     | 0.528<br>(1.484)   | 0.525<br>(1.496)      |
| CEO previous trustee position          | 0.330<br>(0.266)    | 0.361<br>(0.262)     | 0.330<br>(0.264)   | 0.337<br>(0.263)      |
| CEO morality                           | -1.384+<br>(0.563)  | -1.483+<br>(0.550)   | -1.460+<br>(0.553) | -1.492+<br>(0.554)    |

|                                  | Model1               | Model2               | Model3               | Model4                |
|----------------------------------|----------------------|----------------------|----------------------|-----------------------|
|                                  | Environmental        | Governance           | Community            | Employees & Diversity |
| CEO ideology                     | 0.332<br>(0.502)     | 0.490<br>(0.482)     | 0.480<br>(0.485)     | 0.433<br>(0.491)      |
| CEO corporate/foundation overlap | -0.605<br>(0.033)    | -0.676<br>(0.032)    | -0.643<br>(0.032)    | -0.646<br>(0.032)     |
| CEO donations                    | 1.623*<br>(0.046)    | 1.777*<br>(0.047)    | 1.757*<br>(0.048)    | 1.732*<br>(0.048)     |
| CEO foundation count             | -1.148<br>(0.163)    | -1.233<br>(0.167)    | -1.174<br>(0.165)    | -1.168<br>(0.167)     |
| Constant                         | -8.118***<br>(1.994) | -8.554***<br>(2.091) | -8.552***<br>(2.085) | -8.342***<br>(2.071)  |
| Observations                     | 3553                 | 3553                 | 3553                 | 3553                  |
| Wald chi2                        | 73***                | 86***                | 63***                | 64***                 |

Notes: All except Constant are standardized beta coefficients. Robust standard errors in parentheses

Two-tailed tests. + p < 0.1 \* p < 0.05 \*\* p < 0.01 \*\*\* p < 0.001

All controls are lagged.

Table K. Test of H3 on each CSR dimension

|                                    | Model 1              | Model 2             | Model 3              | Model 4               |
|------------------------------------|----------------------|---------------------|----------------------|-----------------------|
|                                    | Environmental        | Governance          | Community            | Employees & Diversity |
| Time since CEO joined              | -0.066*<br>(0.014)   | -0.088**<br>(0.021) | 0.013<br>(0.013)     | -0.044<br>(0.016)     |
| Similarity in board size           | -0.014<br>(0.049)    | 0.129*<br>(0.074)   | 0.030<br>(0.044)     | 0.105*<br>(0.056)     |
| Similarity in number of executives | 0.018<br>(0.038)     | -0.037<br>(0.058)   | -0.072+<br>(0.037)   | -0.048<br>(0.047)     |
| Similarity in size                 | 0.033<br>(0.042)     | 0.275***<br>(0.064) | 0.187***<br>(0.033)  | 0.047<br>(0.042)      |
| Similarity in revenues             | 0.066<br>(0.059)     | 0.044<br>(0.088)    | 0.186***<br>(0.047)  | 0.115*<br>(0.061)     |
| Geographic proximity               | 0.059<br>(0.000)     | -0.041<br>(0.000)   | -0.004<br>(0.000)    | -0.009<br>(0.000)     |
| Corporate performance              | 0.005<br>(0.041)     | 0.030<br>(0.063)    | 0.003<br>(0.042)     | 0.012<br>(0.054)      |
| Resource slack                     | 0.009<br>(1.593)     | -0.009<br>(2.432)   | -0.017<br>(1.684)    | -0.012<br>(2.152)     |
| Board community influential (prct) | 0.003<br>(0.122)     | -0.011<br>(0.186)   | -0.027<br>(0.118)    | 0.047<br>(0.150)      |
| Positive media attention           | -0.027<br>(0.080)    | 0.002<br>(0.123)    | -0.016<br>(0.083)    | 0.004<br>(0.107)      |
| Materiality of CSR concerns        | -0.165***<br>(0.034) | -0.007<br>(0.051)   | -0.000<br>(0.030)    | -0.021<br>(0.037)     |
| Materiality of CSR strengths       | -0.089**<br>(0.023)  | -0.045<br>(0.034)   | -0.246***<br>(0.020) | 0.004<br>(0.026)      |
| CEO duality                        | -0.012<br>(0.096)    | -0.112*<br>(0.144)  | -0.020<br>(0.085)    | -0.030<br>(0.108)     |
| CEO tenure                         | 0.098*<br>(0.007)    | 0.151*<br>(0.011)   | 0.144**<br>(0.006)   | 0.129**<br>(0.007)    |
| CEO ideology                       | 0.071<br>(0.184)     | 0.004<br>(0.277)    | -0.014<br>(0.151)    | 0.062<br>(0.192)      |

|                                                | Model 1             | Model 2           | Model 3             | Model 4               |
|------------------------------------------------|---------------------|-------------------|---------------------|-----------------------|
|                                                | Environmental       | Governance        | Community           | Employees & Diversity |
| CEO corporate/foundation overlap               | -0.039<br>(0.008)   | -0.035<br>(0.012) | -0.129**<br>(0.007) | -0.016<br>(0.009)     |
| Foundation grantmaking diversity               | -0.088+<br>(0.065)  | -0.029<br>(0.098) | 0.032<br>(0.058)    | -0.064<br>(0.076)     |
| Foundation relative size of board of trustee   | 0.013<br>(0.048)    | 0.077<br>(0.072)  | 0.015<br>(0.042)    | 0.007<br>(0.053)      |
| Foundation type                                | 0.103<br>(0.150)    | 0.015<br>(0.224)  | 0.054<br>(0.118)    | 0.108<br>(0.152)      |
| Foundation contributions/Environment           | -0.109**<br>(0.007) |                   |                     |                       |
| Foundation contributions/Human Rights          |                     | -0.019<br>(0.010) |                     |                       |
| Foundation contributions/Community             |                     |                   | -0.084*<br>(0.005)  |                       |
| Foundation contributions/Employees & Diversity |                     |                   |                     | -0.300***<br>(0.010)  |
| Inverse-Mills ratio                            | -0.068*<br>(0.042)  | 0.046<br>(0.064)  | -0.015<br>(0.041)   | -0.009<br>(0.052)     |
| Constant                                       | -5.672<br>(9.468)   | 5.844<br>(14.454) | 7.536<br>(10.005)   | 6.353<br>(12.784)     |
| Observations                                   | 780                 | 780               | 780                 | 780                   |
| Wald chi2                                      | 79.45               | 60.22             | 158.0               | 103.7                 |
| R2(overall)                                    | 0.194               | 0.0454            | 0.338               | 0.284                 |
| Auto-corr Coef.                                | 0.355               | 0.330             | 0.264               | 0.174                 |

Standardized beta coefficients. Standard errors in parentheses

Two-tailed tests. + p < 0.1 \* p < 0.05 \*\* p < 0.01 \*\*\* p < 0.001

Table L – H2 Predicting CEO choice of similar/dissimilar foundation based on whether CSR strength is above or below industry KLD strength (overall KLD strength and by ranking order of KLD strength in a company portfolio of social causes)

|                                    | Model 1<br>Paper           | Model 2<br>Split:<br>higher than<br>ind | Model 3<br>Split:<br>lower than<br>ind | Model 4<br>Overall           | Model 5<br>Split:<br>higher than<br>ind | Model 6<br>Split: lower<br>than ind | Model 7<br>Overall           | Model 8<br>Split:<br>higher than<br>ind | Model 9<br>Split:<br>lower<br>than ind |
|------------------------------------|----------------------------|-----------------------------------------|----------------------------------------|------------------------------|-----------------------------------------|-------------------------------------|------------------------------|-----------------------------------------|----------------------------------------|
|                                    | DV contains all dimensions |                                         |                                        | DV contains rank1 dimensions |                                         |                                     | DV contains rank2 dimensions |                                         |                                        |
| CEO choice (Corp. – Found. Link)   | -0.003*<br>(0.084)         | -0.005**<br>(0.121)                     | 0.001<br>(0.105)                       | -0.005***<br>(0.053)         | -0.004*<br>(0.080)                      | -0.003+<br>(0.060)                  | -0.005***<br>(0.048)         | -0.006**<br>(0.086)                     | -0.001<br>(0.032)                      |
| Similarity in board size           | -0.025***<br>(0.003)       | -0.010***<br>(0.005)                    | -0.040***<br>(0.004)                   | -0.018***<br>(0.002)         | 0.002<br>(0.003)                        | -0.032***<br>(0.002)                | -0.016***<br>(0.002)         | -0.010***<br>(0.004)                    | -0.040***<br>(0.001)                   |
| Similarity in number of executives | -0.007***<br>(0.002)       | -0.012***<br>(0.003)                    | -0.005***<br>(0.003)                   | -0.007***<br>(0.001)         | -0.010***<br>(0.002)                    | -0.003+<br>(0.002)                  | 0.024***<br>(0.001)          | 0.028***<br>(0.002)                     | 0.024***<br>(0.001)                    |
| Similarity in size                 | 0.311***<br>(0.002)        | 0.323***<br>(0.003)                     | 0.350***<br>(0.004)                    | 0.235***<br>(0.001)          | 0.224***<br>(0.002)                     | 0.284***<br>(0.002)                 | 0.195***<br>(0.001)          | 0.228***<br>(0.002)                     | 0.165***<br>(0.001)                    |
| Similarity in revenues             | 0.257***<br>(0.002)        | 0.208***<br>(0.003)                     | 0.260***<br>(0.003)                    | 0.168***<br>(0.001)          | 0.181***<br>(0.002)                     | 0.120***<br>(0.002)                 | 0.131***<br>(0.001)          | 0.151***<br>(0.002)                     | 0.060***<br>(0.001)                    |
| Geographic proximity               | -0.035***<br>(0.000)       | -0.032***<br>(0.000)                    | -0.022***<br>(0.000)                   | -0.021***<br>(0.000)         | -0.018***<br>(0.000)                    | 0.003+<br>(0.000)                   | -0.033***<br>(0.000)         | -0.035***<br>(0.000)                    | 0.001<br>(0.000)                       |
| Corporate performance              | 0.010***<br>(0.004)        | 0.011***<br>(0.009)                     | 0.010***<br>(0.004)                    | 0.003***<br>(0.003)          | 0.005***<br>(0.007)                     | 0.001<br>(0.003)                    | 0.009***<br>(0.003)          | 0.008***<br>(0.008)                     | 0.002*<br>(0.002)                      |
| Resource slack                     | -0.002***<br>(0.022)       | 0.007***<br>(0.113)                     | 0.002*<br>(0.022)                      | 0.001<br>(0.017)             | 0.008***<br>(0.089)                     | 0.005***<br>(0.016)                 | 0.005***<br>(0.015)          | 0.014***<br>(0.098)                     | 0.007***<br>(0.008)                    |
| Board community influential (prct) | 0.011***<br>(0.007)        | 0.005***<br>(0.013)                     | 0.001<br>(0.007)                       | 0.020***<br>(0.005)          | -0.004*<br>(0.010)                      | 0.018***<br>(0.005)                 | 0.020***<br>(0.004)          | 0.012***<br>(0.011)                     | 0.023***<br>(0.003)                    |
| Positive media attention           | -0.009***<br>(0.005)       | -0.010***<br>(0.009)                    | -0.001+<br>(0.005)                     | -0.020***<br>(0.003)         | -0.016***<br>(0.007)                    | -0.011***<br>(0.004)                | -0.011***<br>(0.003)         | 0.001<br>(0.008)                        | -0.010***<br>(0.002)                   |
| Materiality of CSR concerns        | -0.022***<br>(0.002)       | -0.007***<br>(0.003)                    | -0.007***<br>(0.002)                   | -0.015***<br>(0.001)         | 0.039***<br>(0.002)                     | -0.033***<br>(0.002)                | -0.066***<br>(0.001)         | -0.067***<br>(0.002)                    | 0.004**<br>(0.001)                     |
| Materiality of CSR strengths       | -0.055***<br>(0.002)       | -0.053***<br>(0.002)                    | -0.036***<br>(0.003)                   | -0.043***<br>(0.001)         | -0.036***<br>(0.001)                    | -0.020***<br>(0.002)                | -0.107***<br>(0.001)         | -0.053***<br>(0.002)                    | -0.159***<br>(0.001)                   |
| CEO duality                        | -0.026***<br>(0.005)       | -0.018***<br>(0.009)                    | -0.020***<br>(0.005)                   | -0.054***<br>(0.003)         | -0.035***<br>(0.006)                    | -0.037***<br>(0.003)                | -0.054***<br>(0.003)         | -0.056***<br>(0.007)                    | -0.020***<br>(0.002)                   |
| CEO tenure                         | -0.009***<br>(0.000)       | 0.015***<br>(0.001)                     | -0.024***<br>(0.000)                   | 0.044***<br>(0.000)          | 0.049***<br>(0.001)                     | 0.008***<br>(0.000)                 | 0.066***<br>(0.000)          | 0.074***<br>(0.001)                     | 0.003+<br>(0.000)                      |

|                                              | Model 1<br>Paper           | Model 2<br>Split:<br>higher than<br>ind | Model 3<br>Split:<br>lower than<br>ind | Model 4<br>Overall           | Model 5<br>Split:<br>higher than<br>ind | Model 6<br>Split: lower<br>than ind | Model 7<br>Overall           | Model 8<br>Split:<br>higher than<br>ind | Model 9<br>Split:<br>lower<br>than ind |
|----------------------------------------------|----------------------------|-----------------------------------------|----------------------------------------|------------------------------|-----------------------------------------|-------------------------------------|------------------------------|-----------------------------------------|----------------------------------------|
|                                              | DV contains all dimensions |                                         |                                        | DV contains rank1 dimensions |                                         |                                     | DV contains rank2 dimensions |                                         |                                        |
| CEO ideology                                 | -0.011***<br>(0.009)       | -0.003<br>(0.015)                       | -0.011***<br>(0.010)                   | 0.011***<br>(0.006)          | 0.019***<br>(0.010)                     | 0.013***<br>(0.006)                 | -0.004**<br>(0.005)          | -0.013***<br>(0.011)                    | 0.013***<br>(0.003)                    |
| CEO corporate/foundation overlap             | -0.049***<br>(0.001)       | -0.035***<br>(0.001)                    | -0.027***<br>(0.001)                   | -0.070***<br>(0.000)         | -0.035***<br>(0.001)                    | -0.039***<br>(0.000)                | -0.096***<br>(0.000)         | -0.059***<br>(0.001)                    | -0.073***<br>(0.000)                   |
| Foundation grantmaking diversity             | -0.075***<br>(0.003)       | -0.083***<br>(0.005)                    | -0.088***<br>(0.004)                   | -0.079***<br>(0.002)         | -0.092***<br>(0.004)                    | -0.086***<br>(0.002)                | -0.016***<br>(0.002)         | -0.033***<br>(0.004)                    | -0.007***<br>(0.001)                   |
| Foundation relative size of board of trustee | -0.038***<br>(0.003)       | -0.032***<br>(0.004)                    | -0.048***<br>(0.003)                   | -0.030***<br>(0.002)         | -0.021***<br>(0.003)                    | -0.041***<br>(0.002)                | 0.013***<br>(0.002)          | 0.025***<br>(0.003)                     | -0.017***<br>(0.001)                   |
| Foundation type                              | 0.059***<br>(0.008)        | 0.066***<br>(0.012)                     | 0.068***<br>(0.009)                    | 0.048***<br>(0.005)          | 0.059***<br>(0.008)                     | 0.054***<br>(0.005)                 | 0.021***<br>(0.004)          | 0.036***<br>(0.008)                     | 0.002<br>(0.003)                       |
| Inverse-Mills ratio                          | -0.022***<br>(0.002)       | -0.031***<br>(0.004)                    | -0.008***<br>(0.003)                   | -0.050***<br>(0.002)         | -0.053***<br>(0.003)                    | -0.023***<br>(0.002)                | -0.062***<br>(0.001)         | -0.082***<br>(0.003)                    | 0.011***<br>(0.001)                    |
| Constant                                     | -0.337*<br>(0.133)         | -7.274***<br>(0.669)                    | -1.011***<br>(0.132)                   | -0.213*<br>(0.102)           | -4.146***<br>(0.529)                    | -0.569***<br>(0.095)                | -0.374***<br>(0.089)         | -7.028***<br>(0.582)                    | -0.439***<br>(0.046)                   |
| Observations                                 | 954,276                    | 384,109                                 | 570,167                                | 954,276                      | 384,109                                 | 570,167                             | 954,276                      | 384,109                                 | 570,167                                |
| Wald chi2                                    | 151582                     | 51364                                   | 121997                                 | 78889                        | 31253                                   | 47826                               | 75018                        | 33958                                   | 30686                                  |
| R2(overall)                                  | 0.242                      | 0.196                                   | 0.292                                  | 0.158                        | 0.141                                   | 0.141                               | 0.157                        | 0.145                                   | 0.102                                  |
| Auto-corr Coef.                              | 0.155                      | 0.196                                   | 0.134                                  | 0.179                        | 0.131                                   | 0.243                               | 0.361                        | 0.351                                   | 0.442                                  |

Standardized beta coefficients. Standard errors in parentheses. Two-tailed tests. +  $p < 0.1$  \*  $p < 0.05$  \*\*  $p < 0.01$  \*\*\*  $p < 0.001$   $p$ -values are of limited value with a million dyadic observations, a complex data structure, and a combination of limited and continuous independent variables

Table M – H2 Predicting CEO choice of similar/dissimilar foundation based on whether CSR strength is above or below industry KLD strength (overall KLD strength and by ranking order of KLD strength in a company portfolio of social causes) (cont.)

|                                              | Model 10                     | Model 11                     | Model 12                    | Model 13                     | Model 14                     | Model 15                 |
|----------------------------------------------|------------------------------|------------------------------|-----------------------------|------------------------------|------------------------------|--------------------------|
|                                              | Overall                      | Split:<br>higher than<br>ind | Split:<br>lower than<br>ind | Overall                      | Split:<br>higher than<br>ind | Split: lower<br>than ind |
|                                              | DV contains rank3 dimensions |                              |                             | DV contains rank4 dimensions |                              |                          |
| CEO choice (Corp. – Found. Link)             | -0.000<br>(0.027)            | 0.000<br>(0.051)             | -0.002<br>(0.013)           | 0.002<br>(0.045)             | -0.001<br>(0.068)            | 0.004**<br>(0.052)       |
| Similarity in board size                     | 0.039***<br>(0.001)          | 0.059***<br>(0.002)          | 0.008***<br>(0.000)         | -0.046***<br>(0.002)         | -0.042***<br>(0.003)         | -0.042***<br>(0.002)     |
| Similarity in number of executives           | 0.015***<br>(0.001)          | 0.020***<br>(0.002)          | -0.001<br>(0.000)           | -0.007***<br>(0.001)         | -0.012***<br>(0.002)         | -0.009***<br>(0.002)     |
| Similarity in size                           | 0.221***<br>(0.001)          | 0.241***<br>(0.001)          | 0.138***<br>(0.000)         | 0.288***<br>(0.001)          | 0.265***<br>(0.002)          | 0.442***<br>(0.002)      |
| Similarity in revenues                       | 0.066***<br>(0.001)          | 0.063***<br>(0.001)          | 0.076***<br>(0.000)         | 0.329***<br>(0.001)          | 0.322***<br>(0.002)          | 0.269***<br>(0.002)      |
| Geographic proximity                         | -0.035***<br>(0.000)         | -0.050***<br>(0.000)         | 0.002<br>(0.000)            | -0.014***<br>(0.000)         | -0.034***<br>(0.000)         | -0.000<br>(0.000)        |
| Corporate performance                        | 0.006***<br>(0.002)          | 0.013***<br>(0.005)          | 0.001<br>(0.001)            | 0.002**<br>(0.002)           | -0.009***<br>(0.005)         | -0.003***<br>(0.003)     |
| Resource slack                               | 0.000<br>(0.009)             | 0.015***<br>(0.064)          | -0.001<br>(0.003)           | 0.005***<br>(0.014)          | 0.035***<br>(0.070)          | -0.002*<br>(0.014)       |
| Board community influential (prct)           | 0.013***<br>(0.003)          | 0.014***<br>(0.007)          | 0.002+<br>(0.001)           | -0.002+<br>(0.004)           | 0.010***<br>(0.008)          | -0.002*<br>(0.004)       |
| Positive media attention                     | -0.007***<br>(0.002)         | -0.002<br>(0.005)            | -0.004***<br>(0.001)        | 0.007***<br>(0.003)          | -0.005***<br>(0.006)         | 0.011***<br>(0.003)      |
| Materiality of CSR concerns                  | -0.052***<br>(0.001)         | -0.047***<br>(0.001)         | -0.037***<br>(0.000)        | 0.037***<br>(0.001)          | 0.025***<br>(0.002)          | 0.014***<br>(0.001)      |
| Materiality of CSR strengths                 | -0.184***<br>(0.001)         | -0.182***<br>(0.001)         | -0.085***<br>(0.000)        | 0.096***<br>(0.001)          | 0.081***<br>(0.001)          | 0.083***<br>(0.002)      |
| CEO duality                                  | -0.034***<br>(0.002)         | -0.038***<br>(0.004)         | 0.011***<br>(0.001)         | 0.024***<br>(0.003)          | 0.015***<br>(0.005)          | 0.019***<br>(0.003)      |
| CEO tenure                                   | 0.042***<br>(0.000)          | 0.046***<br>(0.000)          | 0.028***<br>(0.000)         | -0.045***<br>(0.000)         | -0.034***<br>(0.000)         | -0.014***<br>(0.000)     |
| CEO ideology                                 | -0.002<br>(0.003)            | 0.003+<br>(0.007)            | 0.001<br>(0.001)            | -0.009***<br>(0.005)         | -0.029***<br>(0.009)         | 0.012***<br>(0.005)      |
| CEO corporate/foundation overlap             | -0.081***<br>(0.000)         | -0.077***<br>(0.000)         | -0.014***<br>(0.000)        | 0.044***<br>(0.000)          | 0.037***<br>(0.000)          | 0.026***<br>(0.000)      |
| Foundation grantmaking diversity             | 0.003*<br>(0.001)            | -0.004*<br>(0.002)           | 0.010***<br>(0.000)         | -0.071***<br>(0.002)         | -0.070***<br>(0.003)         | -0.062***<br>(0.002)     |
| Foundation relative size of board of trustee | 0.038***<br>(0.001)          | 0.051***<br>(0.002)          | 0.011***<br>(0.000)         | -0.021***<br>(0.002)         | -0.017***<br>(0.003)         | -0.020***<br>(0.002)     |
| Foundation type                              | 0.016***<br>(0.002)          | 0.020***<br>(0.005)          | 0.004<br>(0.001)            | 0.019***<br>(0.004)          | 0.005+<br>(0.007)            | 0.042***<br>(0.004)      |
| Inverse-Mills ratio                          | -0.062***<br>(0.001)         | -0.090***<br>(0.002)         | 0.021***<br>(0.000)         | 0.023***<br>(0.001)          | 0.010***<br>(0.002)          | 0.008***<br>(0.002)      |
| Constant                                     | 0.254***                     | -4.426***                    | 0.001                       | -1.292***                    | -15.199***                   | -0.479***                |

|                 | Model 10                     | Model 11                     | Model 12                    | Model 13                     | Model 14                     | Model 15                 |
|-----------------|------------------------------|------------------------------|-----------------------------|------------------------------|------------------------------|--------------------------|
|                 | Overall                      | Split:<br>higher than<br>ind | Split:<br>lower than<br>ind | Overall                      | Split:<br>higher than<br>ind | Split: lower<br>than ind |
|                 | DV contains rank3 dimensions |                              |                             | DV contains rank4 dimensions |                              |                          |
| Observations    | (0.052)                      | (0.381)                      | (0.015)                     | (0.083)                      | (0.414)                      | (0.083)                  |
| Wald chi2       | 954,276                      | 384,109                      | 570,167                     | 954,276                      | 384,109                      | 570,167                  |
| R2(overall)     | 82519                        | 43869                        | 17022                       | 171090                       | 58091                        | 197283                   |
| Auto-corr Coef. | 0.131                        | 0.145                        | 0.0677                      | 0.244                        | 0.192                        | 0.373                    |
|                 | 0.399                        | 0.410                        | 0.343                       | 0.226                        | 0.313                        | 0.169                    |

Standardized beta coefficients. Standard errors in parentheses. Two-tailed tests. +  $p < 0.1$  \*  $p < 0.05$  \*\*  $p < 0.01$  \*\*\*  $p < 0.001$   $p$ -values are of limited value with a million dyadic observations, a complex data structure, and a combination of limited and continuous independent variables

Table O – H2 Predicting CEO choice of similar/dissimilar foundation based on KLD variance

|                                                           | Model 1   | Model 2                     | Model 3                  |
|-----------------------------------------------------------|-----------|-----------------------------|--------------------------|
|                                                           | paper     | control for KLD<br>variance | int with KLD<br>variance |
| CEO choice (Corp. – Found. Link)                          | -0.003*   | -0.133+                     | -0.037                   |
|                                                           | (0.084)   | (0.081)                     | (0.094)                  |
| KLD variance (entropy)                                    |           | -0.152***                   | -0.152***                |
|                                                           |           | (0.001)                     | (0.001)                  |
| CEO choice (Corp. – Found. Link) x KLD variance (entropy) |           |                             | -0.039*                  |
|                                                           |           |                             | (0.019)                  |
| Similarity in board size                                  | -0.025*** | -0.072***                   | -0.072***                |
|                                                           | (0.003)   | (0.003)                     | (0.003)                  |
| Similarity in number of executives                        | -0.007*** | -0.009***                   | -0.009***                |
|                                                           | (0.002)   | (0.002)                     | (0.002)                  |
| Similarity in size                                        | 0.311***  | 0.445***                    | 0.445***                 |
|                                                           | (0.002)   | (0.002)                     | (0.002)                  |
| Similarity in revenues                                    | 0.257***  | 0.397***                    | 0.397***                 |
|                                                           | (0.002)   | (0.002)                     | (0.002)                  |
| Geographic proximity                                      | -0.035*** | -0.000***                   | -0.000***                |
|                                                           | (0.000)   | (0.000)                     | (0.000)                  |
| Corporate performance                                     | 0.010***  | 0.060***                    | 0.060***                 |
|                                                           | (0.004)   | (0.004)                     | (0.004)                  |
| Resource slack                                            | -0.002*** | -0.050*                     | -0.050*                  |
|                                                           | (0.022)   | (0.022)                     | (0.022)                  |
| Board community influential (prct)                        | 0.011***  | 0.026***                    | 0.026***                 |
|                                                           | (0.007)   | (0.006)                     | (0.006)                  |
| Positive media attention                                  | -0.009*** | -0.036***                   | -0.036***                |
|                                                           | (0.005)   | (0.004)                     | (0.004)                  |
| Materiality of CSR concerns                               | -0.022*** | -0.025***                   | -0.025***                |
|                                                           | (0.002)   | (0.002)                     | (0.002)                  |
| Materiality of CSR strengths                              | -0.055*** | -0.086***                   | -0.086***                |
|                                                           | (0.002)   | (0.002)                     | (0.002)                  |
| CEO duality                                               | -0.026*** | -0.057***                   | -0.057***                |
|                                                           | (0.005)   | (0.005)                     | (0.005)                  |
| CEO tenure                                                | -0.009*** | -0.005***                   | -0.005***                |

|                                              | Model 1              | Model 2                     | Model 3                  |
|----------------------------------------------|----------------------|-----------------------------|--------------------------|
|                                              | paper                | control for KLD<br>variance | int with KLD<br>variance |
| CEO ideology                                 | (0.000)<br>-0.011*** | (0.000)<br>-0.088***        | (0.000)<br>-0.088***     |
| CEO corporate/foundation overlap             | (0.009)<br>-0.049*** | (0.009)<br>-0.008***        | (0.009)<br>-0.008***     |
| Foundation grantmaking diversity             | (0.001)<br>-0.075*** | (0.000)<br>-0.199***        | (0.000)<br>-0.199***     |
| Foundation relative size of board of trustee | (0.003)<br>-0.038*** | (0.003)<br>-0.060***        | (0.003)<br>-0.060***     |
| Foundation type                              | (0.003)<br>0.059***  | (0.003)<br>0.250***         | (0.003)<br>0.250***      |
| Inverse-Mills ratio                          | (0.008)<br>-0.022*** | (0.008)<br>-0.020***        | (0.008)<br>-0.020***     |
| Constant                                     | (0.002)<br>-0.337*   | (0.002)<br>-0.544***        | (0.002)<br>-0.544***     |
| Observations                                 | (0.133)<br>954276    | (0.130)<br>954276           | (0.130)<br>954276        |
| Wald chi2                                    | 151581.8             | 207652.361                  | 207659.243               |
| R2(overall)                                  | 0.242                | 0.288                       | 0.288                    |
| Auto-corr Coef.                              | 0.155                | 0.147                       | 0.147                    |

Standardized beta coefficients. Standard errors in parentheses. Two-tailed tests. +  $p < 0.1$  \*  $p < 0.05$  \*\*  $p < 0.01$  \*\*\*  $p < 0.001$   $p$ -values are of limited value with a million dyadic observations, a complex data structure, and a combination of limited and continuous independent variables

Figure P – Interaction CEO in foundation with KLD variance

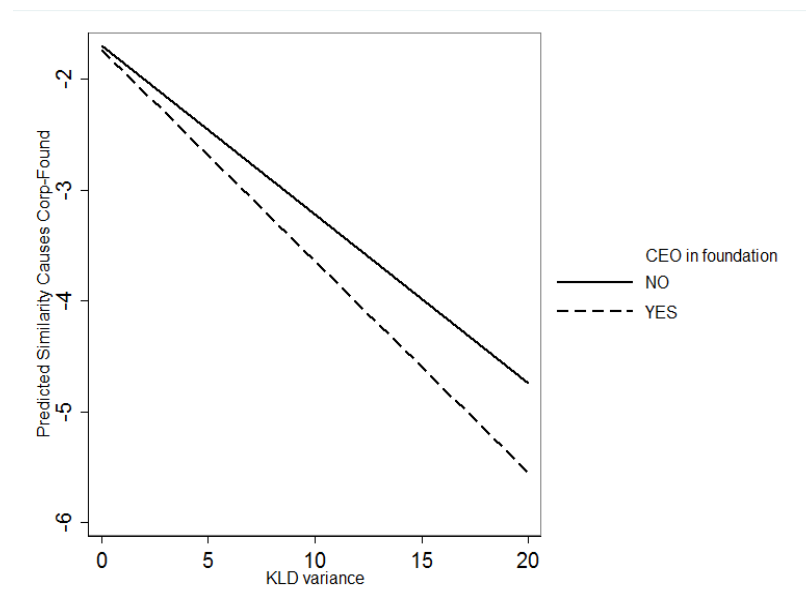

Table Q. Covariates used in main or separate analyses that control for industry, firm and individual-level alternative explanations (H1)

| CSR strengths                          | CEO other public actions - H1 | CEO Effort vs outcome - H1 | CEO attentional capability H1 | CEO discretion - H1 | CEO effect - H1 | Board interlocks - H1 | Firm capability to achieve CSR - H1 | Firm ability to achieve CSR - H1 | Firm attributes - H1 | Firm materiality strengths - H1 |
|----------------------------------------|-------------------------------|----------------------------|-------------------------------|---------------------|-----------------|-----------------------|-------------------------------------|----------------------------------|----------------------|---------------------------------|
| Materiality of CSR concerns            |                               |                            |                               |                     | √               |                       |                                     |                                  |                      | √                               |
| Materiality of CSR strengths           |                               |                            |                               |                     | √               |                       |                                     |                                  |                      | √                               |
| Corporate size                         |                               |                            | √                             |                     |                 |                       |                                     | √                                | √                    |                                 |
| Corporate performance                  |                               |                            | √                             |                     |                 |                       |                                     | √                                | √                    |                                 |
| Resource slack                         |                               |                            | √                             |                     |                 |                       |                                     | √                                | √                    |                                 |
| Innovation differentiation             |                               |                            |                               |                     |                 |                       |                                     |                                  | √                    |                                 |
| Marketing differentiation              |                               |                            |                               |                     |                 |                       |                                     |                                  | √                    |                                 |
| Corporate foundation age               |                               |                            |                               |                     |                 |                       | √                                   |                                  | √                    |                                 |
| Board independence                     |                               |                            |                               | √                   |                 |                       |                                     |                                  |                      |                                 |
| Board community influential (prct)     |                               |                            |                               |                     |                 | √                     | √                                   |                                  |                      |                                 |
| Board with foundation positions (prct) |                               |                            |                               |                     |                 | √                     | √                                   |                                  |                      |                                 |
| Positive media attention               |                               |                            | √                             | √                   |                 |                       |                                     |                                  |                      |                                 |
| Shareholder resolutions                |                               |                            | √                             | √                   |                 |                       |                                     |                                  |                      |                                 |
| Analyst rating                         |                               |                            | √                             | √                   |                 |                       |                                     |                                  |                      |                                 |
| CEO duality                            |                               |                            |                               | √                   |                 |                       |                                     |                                  |                      |                                 |
| CEO tenure                             |                               |                            | √                             | √                   |                 |                       |                                     |                                  |                      |                                 |
| CEO attentional heterogeneity          |                               |                            | √                             |                     |                 |                       |                                     |                                  |                      |                                 |
| CEO previous trustee position          | √                             |                            |                               |                     |                 |                       |                                     |                                  |                      |                                 |
| CEO morality                           |                               |                            |                               |                     | √               |                       |                                     |                                  |                      |                                 |
| CEO ideology                           | √                             |                            |                               |                     | √               |                       |                                     |                                  |                      |                                 |
| CEO corporate/foundation overlap       |                               |                            |                               |                     |                 |                       |                                     |                                  |                      |                                 |
| CEO donation                           | √                             |                            |                               |                     | √               |                       |                                     |                                  |                      |                                 |
| CEO foundation count                   | √                             |                            |                               |                     | √               |                       |                                     |                                  |                      |                                 |
| ASSET4                                 |                               | √                          |                               |                     |                 |                       |                                     |                                  |                      |                                 |
| KLD Industry standardization           |                               |                            |                               |                     |                 |                       |                                     |                                  |                      | √                               |

Table Q. Covariates used in main or separate analyses that control for industry, firm and individual-level alternative explanations (H2&H3ab)

| CSR strengths                          | CEO attributes<br>- H2 | CEO learning<br>- H2 | CEO seeking<br>diversity - H2 | CEO choice versus<br>influence - H2&H3 | Firm level -<br>H2 | Networking by<br>foundation - H2 | Foundation<br>capability - H3 |
|----------------------------------------|------------------------|----------------------|-------------------------------|----------------------------------------|--------------------|----------------------------------|-------------------------------|
| Materiality of CSR concerns            |                        |                      |                               |                                        |                    |                                  |                               |
| Materiality of CSR strengths           |                        |                      |                               |                                        |                    |                                  |                               |
| Corporate size                         |                        |                      |                               |                                        |                    |                                  |                               |
| Corporate performance                  |                        |                      |                               |                                        |                    |                                  |                               |
| Resource slack                         |                        |                      |                               |                                        |                    |                                  |                               |
| Innovation differentiation             |                        |                      |                               |                                        |                    |                                  |                               |
| Marketing differentiation              |                        |                      |                               |                                        |                    |                                  |                               |
| Corporate foundation age               |                        |                      |                               |                                        |                    |                                  |                               |
| Board independence                     |                        |                      |                               |                                        |                    |                                  |                               |
| Board community influential (prct)     |                        |                      | √                             |                                        |                    |                                  |                               |
| Board with foundation positions (prct) |                        |                      | √                             |                                        |                    |                                  |                               |
| Positive media attention               |                        |                      |                               |                                        |                    |                                  |                               |
| Shareholder resolutions                |                        |                      |                               |                                        |                    |                                  |                               |
| Analyst rating                         |                        |                      |                               |                                        |                    |                                  |                               |
| CEO duality                            |                        |                      |                               |                                        |                    |                                  |                               |
| CEO tenure                             |                        | √                    |                               |                                        |                    |                                  |                               |
| CEO attentional heterogeneity          |                        |                      |                               |                                        |                    |                                  |                               |
| CEO previous trustee position          |                        |                      | √                             |                                        |                    |                                  |                               |
| CEO morality                           | √                      |                      |                               |                                        |                    |                                  |                               |
| CEO ideology                           | √                      |                      |                               |                                        |                    |                                  |                               |
| CEO corporate/foundation overlap       |                        | √                    |                               |                                        |                    |                                  |                               |
| CEO donation                           |                        |                      |                               |                                        |                    |                                  |                               |
| CEO foundation count                   |                        |                      |                               |                                        |                    |                                  |                               |
| ASSET4                                 |                        |                      |                               |                                        |                    |                                  |                               |
| KLD Industry standardization           |                        |                      |                               |                                        |                    |                                  |                               |

| CSR strengths                             | CEO attributes - H2 | CEO learning - H2 | CEO seeking diversity - H2 | CEO choice versus influence - H2&H3 | Firm level - H2 | Networking by foundation - H2 | Foundation capability - H3 |
|-------------------------------------------|---------------------|-------------------|----------------------------|-------------------------------------|-----------------|-------------------------------|----------------------------|
| Split sample on CEO foundation overlap H1 |                     | √                 |                            |                                     |                 |                               |                            |
| Split sample on CEO tenure H1             |                     | √                 |                            |                                     |                 |                               |                            |
| Descriptive of foundations H2             |                     |                   | √                          |                                     |                 |                               |                            |
| Inverse mills H2                          |                     |                   |                            |                                     | √               |                               |                            |
| Exactly what we predict h2                |                     |                   |                            |                                     | √               |                               |                            |
| Similarity measures H2                    |                     |                   |                            |                                     |                 | √                             |                            |
| Foundation controls H2                    |                     |                   |                            |                                     |                 | √                             |                            |
| Geographic proximity H2                   |                     |                   |                            |                                     |                 | √                             |                            |
| Treatment H2?                             |                     |                   |                            | √                                   |                 |                               |                            |
| Grantmaking diversity H2&H3               |                     |                   |                            | √                                   |                 | √                             | √                          |
| Social cause of foundation at t-1 H3      |                     |                   |                            |                                     |                 |                               | √                          |

Bouten, L., C.H. Cho, G. Michelon, R.W. Roberts. 2018. CSR Performance Proxies in Large-Sample Studies: 'Umbrella Advocates', Construct Clarity and the'Validity Police'. *SSRN*.

Chin, M., D.C. Hambrick, L.K. Treviño. 2013. Political ideologies of CEOs: The influence of executives' values on corporate social responsibility. *Administrative Science Quarterly* **58**(2) 197-232.

Khan, M., G. Serafeim, A. Yoon. 2016. Corporate sustainability: First evidence on materiality. *The Accounting Review* **91**(6) 1697-1724.

Wooldridge, J.M. 2007. Inverse probability weighted estimation for general missing data problems. *Journal of Econometrics* **141**(2) 1281-1301.

<sup>1</sup>Decomposing the dependent variable of similarity at selection (H2) in a similar way would not result in informative tests, since statistical significance would be of limited value in a large cross-sectional data set with a million observations.
